# Supplementary material for: Long-term toxicity of chlorpromazine, diclofenac and two lanthanides on three generations of Ceriodaphnia dubia
Source: PeerJ. 2023 Nov 20;11:e16472. doi: 10.7717/peerj.16472 (PMC10666609; doi:10.7717/peerj.16472)
Supplement: Data S1 [file peerj-11-16472-s001.xlsx]

## Sheet: Cpz_F1
Chlorpromazine
F1 generation
2021-10-29	(0 day)
Replicate/days Control	0	1	d	2	d	3	d	4	d	5	d	6	d	7	d	8	d	9	d	10	d	11	d	12	d	13	d	14	d	15	d	16	d	17	d	18	d	19	d	20	d	21	d	22	d	23	d	24	d
1	0					0				0				1						2				1				0						11				0				3						4
2	0					0				0				0						1				0				0						5				0				0						6
3	0					0				0				0						0	m
4	0					0				0				0						1				0				0						0				2				1						8
5	0					0				1				0						4				0				0						2				1				3						4
6	0					0				0				0						2				1				0						4				0				0						9
7	0					0				0				0						0				1				2						8				0				3						4
8	0					0				0				0						2				0				2						6				2				1						8
9	0					0				1				0						0				0				0						5				0				2						7
10	0					0				1				0						0				0				1						2				0				2						2
11	0					0				0				0						2				0				0						9				0	m
12	0					0				0				0						2				0				0						3				0				0						3
13	0					0				0				0						0				0				0						3				3				0						8
14	0					0				1				0						3				0				0						0				0				0						4
15	0					0				0				0						0				1				1						2				2				1						8
16	0					0				0				0						2				0				0						4				3				4						4	m
17	0					0				0				0						1				0				2						1				4				1						5
18	0					0				0				0						1				0				0						5				2				1						5
19	0					0				0				0	m
20	0					0				0				0						2				0				0						3				3				2						3
21	0					0				0				0						2				0				1						2				2				0						9
22	0					0				0				0						1				2				0						5				4				2						5
23	0					0				3				1						2				0				2						3				0	m
24	0					0				0				0						1				0				0						2				0				3						2
25	0					0				2				0						1				0				1						2				0				3						7
26	0					0				1				0						0				2				0						7				4				2						3
27	0					0				0				0						2				0				0						5				2				2						4
28	0					0				0				0						2				0				0						4				2				3						4
29	0					0				0				0						2				1				0						2				3				3						5
30	0					0				0				0						1				1				0						5				3				2						6
m - dead daphnium
Replicate/days 0.001 mg/L	0	1	d	2	d	3	d	4	d	5	d	6	d	7	d	8	d	9	d	10	d	11	d	12	d	13	d	14	d	15	d	16	d	17	d	18	d	19	d	20	d	21	d	22	d	23	d	24	d
1	0					0				2				0						5				0				0						4				3				1						7
2	0					0				2				0						1				0				0						3				4				0						5
3	0					0				3				0						0				0				2						2				0	m
4	0					0				1				0						1				0				2						5				1				0						6
5	0					0				0				0						0				1				0						4				2				0	m
6	0					0				0				0						4				0				2						2				1				3						4
7	0					0				0				0						1				0				0						3				1				0						5
8	0					0				0				0						5				0				4						4				0				2						5
9	0					0				0				1						4				5				0						0				7				3						8
10	0					0				3				0						0	m
Replicate/days 0.01 mg/L	0	1	d	2	d	3	d	4	d	5	d	6	d	7	d	8	d	9	d	10	d	11	d	12	d	13	d	14	d	15	d	16	d	17	d	18	d	19	d	20	d	21	d	22	d	23	d	24	d
1	0					0				2				1						0	m
2	0					0				2				1						5				2				0						3				4				1						3
3	0					0				2				2						4				3				2						1				0	m
4	0					0				0				1						4				2				4						3				2				3						5
5	0					0				0				0						2				2				3						5				0				3						3
6	0					0				1				0						4				0				2						3				0				1						8
7	0					0				0				0						0				3				3						2				0				3						3
8	0					0				2				0						2				1				1						5				2				2						5
9	0					0				0				0						2				3				3						4				0				0						0
10	0					0				0				0						2				3				3						2				1				1						2
Replicate/days 0.1 mg/L	0	1	d	2	d	3	d	4	d	5	d	6	d	7	d	8	d	9	d	10	d	11	d	12	d	13	d	14	d	15	d	16	d	17	d	18	d	19	d	20	d	21	d	22	d	23	d	24	d
1	0					0				0				1						3				2				2						2				1				2						2
2	0					0				0				0						3				1				0						0				2				1						2
3	0					0				0				0						3				0				3						0				0				0						0
4	0					0				0				0						2				0				0						3				0				0						0	m
5	0					0				0				0						2				0				2						1				0				0						3
6	0					0				0				0						1				4				2						2				0				0						5
7	0					0				0				0						0				2				1						4				2				1						8
8	0					0				4				0						2				2				2						1				2				3						7
9	0					0				0				1						3				3				0	m
10	0					0				3				2						4				2				3						4				1				2						0	m
[truncated: 39 more columns]

## Sheet: Cpz_F2
Chlorpromazine (Cpz)
F2 generation
2021-11-12	(0 day)
Replicate/days Control	0	1	d	2	d	3	d	4	d	5	d	6	d	7	d	8	d	9	d	10	d	11	d	12	d	13	d	14	d	15	d	16	d	17	d	18	d	19	d	20	d	21	d	22	d	23	d	24	d
1	0					0				0				0						6				2				1						6				0				0						3
2	0					0				0				1						4				2				2						4				1				3						7
3	0					0				0				0						3				3				0						7				0				4						2
4	0					0				0				0						7				0				3						6				1				1						2
5	0					0				0				0						7				1				2						3				3				1						5
6	0					0				0				2						6				2				0	m
7	0					0				0				0						0				0				0						0				0				1						2
8	0					0				0				0						0				4				1						6				1				2						4
9	0					0				0				0						4				2				3						9				0				0						4
10	0					0				0				0						1				0				0						5				0				0						3
11	0					0				0				0						6				0				1						5				0				0						4
12	0					0				0				0						4				3				0						6				1				1	m
13	0					0				0				2						6				0				0						6				2				0						6
14	0					0				1				0						4				0				1						5				0				2						4
15	0					0				0				1						8				1				1						4				3				0						6
16	0					0				0				0						9				4				0						5				0				2						6
17	0					0				0				2						6				2				0						8				1				3						4
18	0					0				0				0						4				2				2						9				0				2						2
19	0					0				0				0						5				2				1	m
20	0					0				0				0						2				4				1						7				0				0						5
21	0					0				0				0						5				5				0						6				1				2						3
22	0					0				0				1						4				5				1						5				2				2						1
23	0					0				0				0						7				3				0						7				3				1						7
24	0					0				0				0						5				4				0						4				2				2						6
25	0					0				0				0						6				1				2						4				0				0						6
26	0					0				0				0						6				0				0						6				0	m
27	0					0				0				0						2				2				1						5				0				0	m
28	0					0				0				0						2				3				2						3				3				0						5
29	0					0				0				0						5				1				0						6				3				0						0	m
30	0					0				0				0						5				1				3						6				3				1						4
m - dead daphnium
Replicate/days 0.001 mg/L	0	1	d	2	d	3	d	4	d	5	d	6	d	7	d	8	d	9	d	10	d	11	d	12	d	13	d	14	d	15	d	16	d	17	d	18	d	19	d	20	d	21	d	22	d	23	d	24	d
1	0					0				0				2						4				1				1						5				0				4						8
2	0					0				0				1						2				1				1						3				0				0	m
3	0					0				0				0						6				1				0	m
4	0					0				1				2						5				1				0						6				0				1						6
5	0					0				0				1						6				0				0						5				2				1						4
6	0					0				0				1						7				0				3						3				3				1						5
7	0					0				0				1						3				0				4						4				4				0						6
8	0					0				0				1						0				3				0						7				1				2						4
9	0					0				1				0						4				0				2						0				2				1						6
10	0					0				0				1						2				1				3						4				5				0						7
Replicate/days 0.01 mg/L	0	1	d	2	d	3	d	4	d	5	d	6	d	7	d	8	d	9	d	10	d	11	d	12	d	13	d	14	d	15	d	16	d	17	d	18	d	19	d	20	d	21	d	22	d	23	d	24	d
1	0					0				0				0						3				0				2						5				0				2						6
2	0					0				0				0						3				1				1						5				0				2						7
3	0					0				0				0						4				0				2						0				3				0						3
4	0					0				0				0						5				1				0						5				1				2						7
5	0					0				0				0						2				1				1						4				2				0						9
6	0					0				0				0						4				3				1						6				1	m
7	0					0				0				0						5				0				0						3				2				1						3
8	0					0				1				0						4				0				0						7				1				3						5
9	0					0				0				0						3				0				0						6				0				4						3
10	0					0				0				0						2				0				1						7				3				3						6
Replicate/days 0.1 mg/L	0	1	d	2	d	3	d	4	d	5	d	6	d	7	d	8	d	9	d	10	d	11	d	12	d	13	d	14	d	15	d	16	d	17	d	18	d	19	d	20	d	21	d	22	d	23	d	24	d
1	0					0				0				0						1				0				0						2				1				3						3
2	0					0				0				0						1				1				1						4				2				1						5
3	0					0				0				0						1				1				1						4				3				1						4
4	0					0				0				0						1				0				1						2				3				0						2
5	0					0				0				0						6				0				2						8				1				2						3
6	0					0				0				0						4				0				2						2				3				0						4
7	0					0				1				0	m
8	0					0				0				0						3				1				2						4				2				4						3
9	0					0				0				0						2				2				1						6				1				0						5
10	0					0				0				0						0				0				1						1				1				2						4
[truncated: 39 more columns]

## Sheet: Cpz_F3
Chlorpromazine (Cpz)
F3 generation
2021-11-22	(0 day)
Replicate/days Control	0	1	d	2	d	3	d	4	d	5	d	6	d	7	d	8	d	9	d	10	d	11	d	12	d	13	d	14	d	15	d	16	d	17	d	18	d	19	d	20	d	21	d	22	d	23	d	24	d
1	0			0				0						1				0				1						5				3				2						3				5
2	0			0				0						1				0				0						1				1	m
3	0			0				0						2				3				1						4				1				1						2				2
4	0			0				0						4				0				2						3				4				1						2				4
5	0			0				0						0				1				2						0				0				0						8				1
6	0			0				0						0				1				0						0				2				2						2				0	m
7	0			0				0						1				1				1						0				0				1						2				0	m
8	0			0				0						3				1				0						3				3				2						5				0
9	0			0				0						2				0				1						4				2				0						4				1
10	0			0				0						1				2				0						1				0				0						3	m
11	0			0				0						4				0				0						0				0				0						0				0
12	0			0				0						0				0				0						0				3				3						2				4
13	0			0				0						1				1				0						1				5				1						5				1
14	0			0				1						2				2				2						2				3				1						2				3
15	0			0				0						3				0				0						3				2				1						6				1
16	0			0				0						3				1				0						2				3				1						4				1
17	0			0				0						3				0				0						5				5				4						0				1
18	0			0				0						2				0				0						1				3				2						3				5
19	0			0				0						4				0				0						5				4				1						6				1
20	0			0				0						2				2				1						5				4				2						2				6
21	0			0				0						0				2				0						4				6				1						6				2	m
22	0			0				0						2				0				0						5				5				4						5				2	m
23	0			0				0						0				1				2						4				4	m
24	0			0				0						0				0				0						2				1				3						4				3
25	0			0				0						0				1				0						0				3				1						5				2
26	0			0				0						0				2				1						0				0				0	m
27	0			0				0						0				2				1						6				3				3						5				1
28	0			0				0						2				0				1						3				0				4						3				4
29	0			0				0						5				2				0						3				2				2						9				4
30	0			0				0						2				2				0						0				1				3						1				5
m - dead daphnium
Replicate/days 0.001 mg/L	0	1	d	2	d	3	d	4	d	5	d	6	d	7	d	8	d	9	d	10	d	11	d	12	d	13	d	14	d	15	d	16	d	17	d	18	d	19	d	20	d	21	d	22	d	23	d	24	d
1	0			0				0						2				4				0						1				1				0						4				1
2	0			0				0						2				2				2						5				3				1						2	m
3	0			0				0						2				2				2						1				1				0						1				2
4	0			0				0						0				3				2						1				2				0						4				5
5	0			0				0						1				3				3						0				1				4						2				2
6	0			0				0						3				2				3						7				2				3						3				0
7	0			0				0						3				1				2						4				3				1						2				1
8	0			0				0						0				0				2						3				0				0						0	m
9	0			0				0						0				1				2						4				2	m
10	0			0				0						1				1				3						4				1				1						1				4
Replicate/days 0.01 mg/L	0	1	d	2	d	3	d	4	d	5	d	6	d	7	d	8	d	9	d	10	d	11	d	12	d	13	d	14	d	15	d	16	d	17	d	18	d	19	d	20	d	21	d	22	d	23	d	24	d
1	0			0				0						3				3				0						1				0				2	m
2	0			0				0						0				2				0						1	m
3	0			0				0						2				2				3						3				0				0						2				3
4	0			0				0						3				1				3						3				3				0	m
5	0			0				0						1				2				1						5				3				0						4				2
6	0			0				0						1				3				1						3				3	m
7	0			0				0						2				2				1						5				0				2						0				2
8	0			0				0						1				3				2						5				1				0						1				3
9	0			0				0						0				1				1						4				0				2						0	m
10	0			0				0						1				1				2						2				2				3						1				3
Replicate/days 0.1 mg/L	0	1	d	2	d	3	d	4	d	5	d	6	d	7	d	8	d	9	d	10	d	11	d	12	d	13	d	14	d	15	d	16	d	17	d	18	d	19	d	20	d	21	d	22	d	23	d	24	d
1	0			0				0						0				3				1						2				0				0						3				0
2	0			0				0						1				0				2						3				0				2						0				0
3	0			0				0						0				1				0						0				1				0						0				0
4	0			0				0						0				0				1						3				1				0						2				0
5	0			0				0						1				2				0						1				2				1	m
6	0			0				0						1				3				0						3				1				3						0				0
7	0			0				0						0				0				0	m
8	0			0				0						3				3				0						2				2				2						2				0
9	0			0				0						0				3				0						2				3				0						3				0
10	0			0				0						4				1				1						0				1				2						0				2	m
[truncated: 39 more columns]

## Sheet: DCF_F1
Diclofenac (DCF)
F1 generation
2021-10-29	(0 day)
Replicate/days Control	0	1	d	2	d	3	d	4	d	5	d	6	d	7	d	8	d	9	d	10	d	11	d	12	d	13	d	14	d	15	d	16	d	17	d	18	d	19	d	20	d	21	d	22	d	23	d	24	d
1	0					0				0				1						2				1				0						11				0				3						4
2	0					0				0				0						1				0				0						5				0				0						6
3	0					0				0				0						0	m
4	0					0				0				0						1				0				0						0				2				1						8
5	0					0				1				0						4				0				0						2				1				3						4
6	0					0				0				0						2				1				0						4				0				0						9
7	0					0				0				0						0				1				2						8				0				3						4
8	0					0				0				0						2				0				2						6				2				1						8
9	0					0				1				0						0				0				0						5				0				2						7
10	0					0				1				0						0				0				1						2				0				2						2
11	0					0				0				0						2				0				0						9				0	m
12	0					0				0				0						2				0				0						3				0				0						3
13	0					0				0				0						0				0				0						3				3				0						8
14	0					0				1				0						3				0				0						0				0				0						4
15	0					0				0				0						0				1				1						2				2				1						8
16	0					0				0				0						2				0				0						4				3				4						4	m
17	0					0				0				0						1				0				2						1				4				1						5
18	0					0				0				0						1				0				0						5				2				1						5
19	0					0				0				0	m
20	0					0				0				0						2				0				0						3				3				2						3
21	0					0				0				0						2				0				1						2				2				0						9
22	0					0				0				0						1				2				0						5				4				2						5
23	0					0				3				1						2				0				2						3				0	m
24	0					0				0				0						1				0				0						2				0				3						2
25	0					0				2				0						1				0				1						2				0				3						7
26	0					0				1				0						0				2				0						7				4				2						3
27	0					0				0				0						2				0				0						5				2				2						4
28	0					0				0				0						2				0				0						4				2				3						4
29	0					0				0				0						2				1				0						2				3				3						5
30	0					0				0				0						1				1				0						5				3				2						6
m - dead daphnium
Replicate/days 0.1 mg/L	0	1	d	2	d	3	d	4	d	5	d	6	d	7	d	8	d	9	d	10	d	11	d	12	d	13	d	14	d	15	d	16	d	17	d	18	d	19	d	20	d	21	d	22	d	23	d	24	d
1	0					0				0				0						2				3				2						4				0				3						7
2	0					0				0				0						3				0				2						3				0				0	m
3	0					0				0				0						4				2				1						4				0				0						6
4	0					0				0				0						2				3				0						6				1				3						1
5	0					0				0				0						2				0				2						5				0				0						7
6	0					0				0				0						2				0				2						2				0				1						6
7	0					0				1				0						0				3				0						2				3				0						5
8	0					0				0				1						6				0				0						4				2				0						7
9	0					0				0				0						0	m
10	0					0				1				0						1				2				3						2				0				1						6
Replicate/days 1 mg/L	0	1	d	2	d	3	d	4	d	5	d	6	d	7	d	8	d	9	d	10	d	11	d	12	d	13	d	14	d	15	d	16	d	17	d	18	d	19	d	20	d	21	d	22	d	23	d	24	d
1	0					0				0				0						2				3				4						5				0				0						7
2	0					0				1				0						3				0				5						4				0				0						1	m
3	0					0				1				0	m
4	0					0				0				1						5				0				3						3				4				0						6
5	0					0				1				0						3				0				2						2				0				0						4
6	0					0				1				0						3				0				3						4				1				1						7
7	0					0				1				0						1				3				0						4				0				4						7
8	0					0				2				0						3				0				0						3				0	m
9	0					0				1				0						1				2				0						3				0				0						6
10	0					0				2				0						3				0				1						4				3				0						3
Replicate/days 10 mg/L	0	1	d	2	d	3	d	4	d	5	d	6	d	7	d	8	d	9	d	10	d	11	d	12	d	13	d	14	d	15	d	16	d	17	d	18	d	19	d	20	d	21	d	22	d	23	d	24	d
1	0					0				2				0						5				0				4						4				0				0						8
2	0					0				0				0						1				0				1						5				0				3						3
3	0					0				0				0						3				0				0						3				0				0						3
4	0					0				0				0						1				1				0						4				2				0						1
5	0					0				2				0	m
6	0					0				0				0						4				0				3						5				0				2						5
7	0					0				0				0						4				1				2						2				0				0						6
8	0					0				0				0						4				1				2						3				0				0						5
9	0					0				0				1						4				2				1						6				3				2						7
10	0					0				1				0						2				3				4						0				4				0						9
[truncated: 39 more columns]

## Sheet: DCF_F2
Diclofenac (DCF)
F2 generation
2021-11-12	(0 day)
Replicate/days Control	0	1	d	2	d	3	d	4	d	5	d	6	d	7	d	8	d	9	d	10	d	11	d	12	d	13	d	14	d	15	d	16	d	17	d	18	d	19	d	20	d	21	d	22	d	23	d	24	d
1	0					0				0				0						6				2				1						6				0				0						3
2	0					0				0				1						4				2				2						4				1				3						7
3	0					0				0				0						3				3				0						7				0				4						2
4	0					0				0				0						7				0				3						6				1				1						2
5	0					0				0				0						7				1				2						3				3				1						5
6	0					0				0				2						6				2				0	m
7	0					0				0				0						0				0				0						0				0				1						2
8	0					0				0				0						0				4				1						6				1				2						4
9	0					0				0				0						4				2				3						9				0				0						4
10	0					0				0				0						1				0				0						5				0				0						3
11	0					0				0				0						6				0				1						5				0				0						4
12	0					0				0				0						4				3				0						6				1				1	m
13	0					0				0				2						6				0				0						6				2				0						6
14	0					0				1				0						4				0				1						5				0				2						4
15	0					0				0				1						8				1				1						4				3				0						6
16	0					0				0				0						9				4				0						5				0				2						6
17	0					0				0				2						6				2				0						8				1				3						4
18	0					0				0				0						4				2				2						9				0				2						2
19	0					0				0				0						5				2				1	m
20	0					0				0				0						2				4				1						7				0				0						5
21	0					0				0				0						5				5				0						6				1				2						3
22	0					0				0				1						4				5				1						5				2				2						1
23	0					0				0				0						7				3				0						7				3				1						7
24	0					0				0				0						5				4				0						4				2				2						6
25	0					0				0				0						6				1				2						4				0				0						6
26	0					0				0				0						6				0				0						6				0	m
27	0					0				0				0						2				2				1						5				0				0	m
28	0					0				0				0						2				3				2						3				3				0						5
29	0					0				0				0						5				1				0						6				3				0						0	m
30	0					0				0				0						5				1				3						6				3				1						4
m - dead daphnium
Replicate/days 0.1 mg/L	0	1	d	2	d	3	d	4	d	5	d	6	d	7	d	8	d	9	d	10	d	11	d	12	d	13	d	14	d	15	d	16	d	17	d	18	d	19	d	20	d	21	d	22	d	23	d	24	d
1	0					0				0				1						3				3				0						5				2				3						3
2	0					0				0				0						3				0				0						0	m
3	0					0				0				0						1				1				0						5				1				4						3
4	0					0				0				0						4				0				3						4				0				3						2
5	0					0				0				0						0				1				3						1				0	m
6	0					0				0				0						1				2				0						5				3				2						5
7	0					0				0				0						4				0				0						4				4				0						4
8	0					0				1				1						4				0				2						2				4				0						5
9	0					0				0				0						6				1				0						4				6				5						3
10	0					0				0				0						0				2				3						2				0	m
Replicate/days 1 mg/L	0	1	d	2	d	3	d	4	d	5	d	6	d	7	d	8	d	9	d	10	d	11	d	12	d	13	d	14	d	15	d	16	d	17	d	18	d	19	d	20	d	21	d	22	d	23	d	24	d
1	0					0				0				0						6				0				3						4				7				0						7
2	0					0				0				0						3				1				0						4				2				0						9
3	0					0				0				0						3				0				0						5				2				2						4	m
4	0					0				0				0						5				1				3						7				0				3						5
5	0					0				0				0						3				0				0						5				2				2						2
6	0					0				0				0						5				0				2						4				4				0						5
7	0					0				0				0						7				0				0						3				2				0						2
8	0					0				0				1						6				0				0						5				1				0	m
9	0					0				0				0						7				0				0						3				1				2						7
10	0					0				0				0						4				3				2						2				3				0						2
Replicate/days 10 mg/L	0	1	d	2	d	3	d	4	d	5	d	6	d	7	d	8	d	9	d	10	d	11	d	12	d	13	d	14	d	15	d	16	d	17	d	18	d	19	d	20	d	21	d	22	d	23	d	24	d
1	0					0				0				0						0				0	m
2	0					0				0				0						3				1				2						4				4				0						4
3	0					0				0				5						6				1				1						1				4				0						1
4	0					0				0				0						5				0	m
5	0					0				0				0						0				0				0						0				0				0	m
6	0					0				0				1						5				1				0	m
7	0					0				0				0						2				0				0						4				2				1						4
8	0					0				0				0						1				1				2						6				0				0						6
9	0					0				0				0						5				0				4						4				5				0						6
10	0					0				0				0						3				1				3						3				3				0						4
[truncated: 39 more columns]

## Sheet: DCF_F3
Diclofenac (DCF)
F3 generation
2021-11-22	(0 day)
Replicate/days Control	0	1	d	2	d	3	d	4	d	5	d	6	d	7	d	8	d	9	d	10	d	11	d	12	d	13	d	14	d	15	d	16	d	17	d	18	d	19	d	20	d	21	d	22	d	23	d	24	d
1	0			0				0						1				0				1						5				3				2						3				5
2	0			0				0						1				0				0						1				1	m
3	0			0				0						2				3				1						4				1				1						2				2
4	0			0				0						4				0				2						3				4				1						2				4
5	0			0				0						0				1				2						0				0				0						8				1
6	0			0				0						0				1				0						0				2				2						2				0	m
7	0			0				0						1				1				1						0				0				1						2				0	m
8	0			0				0						3				1				0						3				3				2						5				0
9	0			0				0						2				0				1						4				2				0						4				1
10	0			0				0						1				2				0						1				0				0						3	m
11	0			0				0						4				0				0						0				0				0						0				0
12	0			0				0						0				0				0						0				3				3						2				4
13	0			0				0						1				1				0						1				5				1						5				1
14	0			0				1						2				2				2						2				3				1						2				3
15	0			0				0						3				0				0						3				2				1						6				1
16	0			0				0						3				1				0						2				3				1						4				1
17	0			0				0						3				0				0						5				5				4						0				1
18	0			0				0						2				0				0						1				3				2						3				5
19	0			0				0						4				0				0						5				4				1						6				1
20	0			0				0						2				2				1						5				4				2						2				6
21	0			0				0						0				2				0						4				6				1						6				2	m
22	0			0				0						2				0				0						5				5				4						5				2	m
23	0			0				0						0				1				2						4				4	m
24	0			0				0						0				0				0						2				1				3						4				3
25	0			0				0						0				1				0						0				3				1						5				2
26	0			0				0						0				2				1						0				0				0	m
27	0			0				0						0				2				1						6				3				3						5				1
28	0			0				0						2				0				1						3				0				4						3				4
29	0			0				0						5				2				0						3				2				2						9				4
30	0			0				0						2				2				0						0				1				3						1				5
m - dead daphnium
Replicate/days 0.1 mg/L	0	1	d	2	d	3	d	4	d	5	d	6	d	7	d	8	d	9	d	10	d	11	d	12	d	13	d	14	d	15	d	16	d	17	d	18	d	19	d	20	d	21	d	22	d	23	d	24	d
1	0			0				0						3				2				0						5				1				0						7				1
2	0			0				0						3				1				2						3				0				4						8				0
3	0			0				0						2				0				0						5				0				0						1	m
4	0			0				0						3				2				3						3				1				1						1				2
5	0			0				0						5				2				0						4				3				2	m
6	0			0				0						4				0				0						9				2	m
7	0			0				0						2				2				0						5				2				0						4				3
8	0			0				0						3				1				0						6				1				0						5				1
9	0			0				0						4				0				3						3				0	m
10	0			0				0						2				1				1						7				2				0						0				3
Replicate/days 1 mg/L	0	1	d	2	d	3	d	4	d	5	d	6	d	7	d	8	d	9	d	10	d	11	d	12	d	13	d	14	d	15	d	16	d	17	d	18	d	19	d	20	d	21	d	22	d	23	d	24	d
1	0			0				0						3				0				0						3				1				2						8				0
2	0			0				0						1				1				0						6				3				0	m
3	0			0				0						3				1				2						0				0	m
4	0			0				0						3				1				1						6				3	m
5	0			0				0						4				0				0						4				3				3						1				4
6	0			0				0						4				0				2						2				1				0	m
7	0			0				0						4				0				0						4				2				2						6				3
8	0			0				0						2				1				2						6				0	m
9	0			0				0						0				0				3						4				0				4						2	m
10	0			0				0						1				1				1						8				5				2						2				4
Replicate/days 10 mg/L	0	1	d	2	d	3	d	4	d	5	d	6	d	7	d	8	d	9	d	10	d	11	d	12	d	13	d	14	d	15	d	16	d	17	d	18	d	19	d	20	d	21	d	22	d	23	d	24	d
1	0			0				0						1				0				2						0	m
2	0			0				0						3				2				0						1				5				0						0	m
3	0			0				0						3				0				1						1	m
4	0			0				0						2				1				0						0				4				3						3				3
5	0			0				0						2				2				1						5				2	m
6	0			0				0						0				2				0						4				1	m
7	0			0				0						4				0				0						3				2	m
8	0			0				0						1				1				0						3				4				2						3				2
9	0			0				0						2				2				1						5				4				0	m
10	0			0				0						4				0				2						3				0				0	m
[truncated: 39 more columns]

## Sheet: Gd_F1
Gadolinium
F1 generation
2021-10-29	(0 day)
Replicate/days Control	0	1	d	2	d	3	d	4	d	5	d	6	d	7	d	8	d	9	d	10	d	11	d	12	d	13	d	14	d	15	d	16	d	17	d	18	d	19	d	20	d	21	d	22	d	23	d	24	d
1	0					0				0				1						2				1				0						11				0				3						4
2	0					0				0				0						1				0				0						5				0				0						6
3	0					0				0				0						0	m
4	0					0				0				0						1				0				0						0				2				1						8
5	0					0				1				0						4				0				0						2				1				3						4
6	0					0				0				0						2				1				0						4				0				0						9
7	0					0				0				0						0				1				2						8				0				3						4
8	0					0				0				0						2				0				2						6				2				1						8
9	0					0				1				0						0				0				0						5				0				2						7
10	0					0				1				0						0				0				1						2				0				2						2
11	0					0				0				0						2				0				0						9				0	m
12	0					0				0				0						2				0				0						3				0				0						3
13	0					0				0				0						0				0				0						3				3				0						8
14	0					0				1				0						3				0				0						0				0				0						4
15	0					0				0				0						0				1				1						2				2				1						8
16	0					0				0				0						2				0				0						4				3				4						4	m
17	0					0				0				0						1				0				2						1				4				1						5
18	0					0				0				0						1				0				0						5				2				1						5
19	0					0				0				0	m
20	0					0				0				0						2				0				0						3				3				2						3
21	0					0				0				0						2				0				1						2				2				0						9
22	0					0				0				0						1				2				0						5				4				2						5
23	0					0				3				1						2				0				2						3				0	m
24	0					0				0				0						1				0				0						2				0				3						2
25	0					0				2				0						1				0				1						2				0				3						7
26	0					0				1				0						0				2				0						7				4				2						3
27	0					0				0				0						2				0				0						5				2				2						4
28	0					0				0				0						2				0				0						4				2				3						4
29	0					0				0				0						2				1				0						2				3				3						5
30	0					0				0				0						1				1				0						5				3				2						6
m - dead daphnium
Replicate/days 0.425 µg/L	0	1	d	2	d	3	d	4	d	5	d	6	d	7	d	8	d	9	d	10	d	11	d	12	d	13	d	14	d	15	d	16	d	17	d	18	d	19	d	20	d	21	d	22	d	23	d	24	d
1	0					0				0				0						4				1				3						3				2				1						2
2	0					0				0				0						2				2				3						3				0				3						4
3	0					0				0				0						3				1				2						1				1				2						2
4	0					0				1				0						2				3				1						2				1				2						5
5	0					0				0				0						2				1				0						6				1				2						3
6	0					0				0				0						2				2				3						3				0				1						4
7	0					0				0				0						2				0				3						3				0				1						1
8	0					0				0				0						2				1				3						4				0				2						4
9	0					0				0				0						2				1				3						4				0				4						4
10	0					0				1				1						1				2				2						3				1				3						3
Replicate/days 4.25 µg/L	0	1	d	2	d	3	d	4	d	5	d	6	d	7	d	8	d	9	d	10	d	11	d	12	d	13	d	14	d	15	d	16	d	17	d	18	d	19	d	20	d	21	d	22	d	23	d	24	d
1	0					0				0				0						3				0	m
2	0					0				1				0						3				0				1						3				1				3						5
3	0					0				2				0						0				2				2						2				3				0						7
4	0					0				0				0						0				2				4						2				1				1						5
5	0					0				0				0						0	m
6	0					0				0				0						2				2				2						5				3				2						3
7	0					0				0				0						0				2				2						1				3				1						4
8	0					0				1				0						2				0				1						1				1				1						7
9	0					0				1				0						3				1				1						2				0				2						4
10	0					0				1				0						0				3				0						2				4				0						6
Replicate/days 42.5 µg/L	0	1	d	2	d	3	d	4	d	5	d	6	d	7	d	8	d	9	d	10	d	11	d	12	d	13	d	14	d	15	d	16	d	17	d	18	d	19	d	20	d	21	d	22	d	23	d	24	d
1	0					0				0				0	m
2	0					0				0				1						2				1				1						5				1				2						2
3	0					0				0				0						1				3				1						4				2				2						3
4	0					0				0				0						1				0				1						3				1				1						4
5	0					0				0				0						3				4				2						0				0				0						2
6	0					0				0				2						3				3				1						2				1				1						4
7	0					0				0				0						2				4				3						2				3				0						1
8	0					0				1				0	m
9	0					0				0				0						2				1				2						3				1				1						5
10	0					0				0				0						2				1				0						2	m
Replicate/days 425 µg/L	0	1	d	2	d	3	d	4	d	5	d	6	d	7	d	8	d	9	d	10	d	11	d	12	d	13	d	14	d	15	d	16	d	17	d	18	d	19	d	20	d	21	d	22	d	23	d	24	d
1	0			0	m
2	0			0	m
3	0			0	m
4	0			0	m
5	0			0	m
6	0			0	m
7	0			0	m
8	0			0	m
9	0			0	m
10	0			0	m
[truncated: 39 more columns]

## Sheet: Gd_F2
Gadolinium
F2 generation
2021-11-12	(0 day)
Replicate/days Control	0	1	d	2	d	3	d	4	d	5	d	6	d	7	d	8	d	9	d	10	d	11	d	12	d	13	d	14	d	15	d	16	d	17	d	18	d	19	d	20	d	21	d	22	d	23	d	24	d
1	0					0				0				0						6				2				1						6				0				0						3
2	0					0				0				1						4				2				2						4				1				3						7
3	0					0				0				0						3				3				0						7				0				4						2
4	0					0				0				0						7				0				3						6				1				1						2
5	0					0				0				0						7				1				2						3				3				1						5
6	0					0				0				2						6				2				0	m
7	0					0				0				0						0				0				0						0				0				1						2
8	0					0				0				0						0				4				1						6				1				2						4
9	0					0				0				0						4				2				3						9				0				0						4
10	0					0				0				0						1				0				0						5				0				0						3
11	0					0				0				0						6				0				1						5				0				0						4
12	0					0				0				0						4				3				0						6				1				1	m
13	0					0				0				2						6				0				0						6				2				0						6
14	0					0				1				0						4				0				1						5				0				2						4
15	0					0				0				1						8				1				1						4				3				0						6
16	0					0				0				0						9				4				0						5				0				2						6
17	0					0				0				2						6				2				0						8				1				3						4
18	0					0				0				0						4				2				2						9				0				2						2
19	0					0				0				0						5				2				1	m
20	0					0				0				0						2				4				1						7				0				0						5
21	0					0				0				0						5				5				0						6				1				2						3
22	0					0				0				1						4				5				1						5				2				2						1
23	0					0				0				0						7				3				0						7				3				1						7
24	0					0				0				0						5				4				0						4				2				2						6
25	0					0				0				0						6				1				2						4				0				0						6
26	0					0				0				0						6				0				0						6				0	m
27	0					0				0				0						2				2				1						5				0				0	m
28	0					0				0				0						2				3				2						3				3				0						5
29	0					0				0				0						5				1				0						6				3				0						0	m
30	0					0				0				0						5				1				3						6				3				1						4
m - dead daphnium
Replicate/days 0.425 µg/L	0	1	d	2	d	3	d	4	d	5	d	6	d	7	d	8	d	9	d	10	d	11	d	12	d	13	d	14	d	15	d	16	d	17	d	18	d	19	d	20	d	21	d	22	d	23	d	24	d
1	0					0				0				0						8				0				2						2				3				1						7
2	0					0				0				0						7				0				2						4				3				0						6
3	0					0				0				0						3				1				1						2				2				0						5
4	0					0				0				0						6				0				2						3				4				0						3
5	0					0				0				0						5				0				1						5				3				0						8
6	0					0				0				1						4				0				2						1				2				1						6
7	0					0				0				0						5				0				2						4				4				0						4
8	0					0				0				0						6				0				1						3				1				2						3
9	0					0				0				2						7				0				3						4				3				0						6
10	0					0				0				0						7				0				1						4				3				0						6
Replicate/days 4.25 µg/L	0	1	d	2	d	3	d	4	d	5	d	6	d	7	d	8	d	9	d	10	d	11	d	12	d	13	d	14	d	15	d	16	d	17	d	18	d	19	d	20	d	21	d	22	d	23	d	24	d
1	0					0				0				1						5				0				2						4				0	m
2	0					0				0				1						3				0				0						4				5				0						7
3	0					0				0				1						4				1				4						2				3				0						7
4	0					0				0				1						7				0				0						3				0				0						3
5	0					0				0				0						3				3				0						6				0	m
6	0					0				0				0						4				1				1						0	m
7	0					0				0				1						2				2				0						3				0				3						0
8	0					0				0				0						6				0				0						5				3				1						2
9	0					0				0				0						1				0				1						2				3				0						6
10	0					0				0				0						2				2				0						5				2				3						5
Replicate/days 42.5 µg/L	0	1	d	2	d	3	d	4	d	5	d	6	d	7	d	8	d	9	d	10	d	11	d	12	d	13	d	14	d	15	d	16	d	17	d	18	d	19	d	20	d	21	d	22	d	23	d	24	d
1	0					0				0				2						2				0				2						2				3				3						4
2	0					0				0				1						2				3				0						4				1				1						3
3	0					0				0				0						4				0				0						3				2				2						2
4	0					0				0				1						4				1				0						3				3				4						2
5	0					0				0				2						1				0				0						3				2				3						2
6	0					0				0				0						3				0				0						4				2				3						1
7	0					0				0				0						4				1				1						4				0				2						1	m
8	0					0				0				0						2				0				2						1				3				1						5
9	0					0				0				2						3				0				2						1				3				0						0	m
10	0					0				0				1						1				0				0						3				1				1						2	m
[truncated: 39 more columns]

## Sheet: Gd_F3
Gadolinium
F3 generation
2021-11-22	(0 day)
Replicate/days Control	0	1	d	2	d	3	d	4	d	5	d	6	d	7	d	8	d	9	d	10	d	11	d	12	d	13	d	14	d	15	d	16	d	17	d	18	d	19	d	20	d	21	d	22	d	23	d	24	d
1	0			0				0						1				0				1						5				3				2						3				5
2	0			0				0						1				0				0						1				1	m
3	0			0				0						2				3				1						4				1				1						2				2
4	0			0				0						4				0				2						3				4				1						2				4
5	0			0				0						0				1				2						0				0				0						8				1
6	0			0				0						0				1				0						0				2				2						2				0	m
7	0			0				0						1				1				1						0				0				1						2				0	m
8	0			0				0						3				1				0						3				3				2						5				0
9	0			0				0						2				0				1						4				2				0						4				1
10	0			0				0						1				2				0						1				0				0						3	m
11	0			0				0						4				0				0						0				0				0						0				0
12	0			0				0						0				0				0						0				3				3						2				4
13	0			0				0						1				1				0						1				5				1						5				1
14	0			0				1						2				2				2						2				3				1						2				3
15	0			0				0						3				0				0						3				2				1						6				1
16	0			0				0						3				1				0						2				3				1						4				1
17	0			0				0						3				0				0						5				5				4						0				1
18	0			0				0						2				0				0						1				3				2						3				5
19	0			0				0						4				0				0						5				4				1						6				1
20	0			0				0						2				2				1						5				4				2						2				6
21	0			0				0						0				2				0						4				6				1						6				2	m
22	0			0				0						2				0				0						5				5				4						5				2	m
23	0			0				0						0				1				2						4				4	m
24	0			0				0						0				0				0						2				1				3						4				3
25	0			0				0						0				1				0						0				3				1						5				2
26	0			0				0						0				2				1						0				0				0	m
27	0			0				0						0				2				1						6				3				3						5				1
28	0			0				0						2				0				1						3				0				4						3				4
29	0			0				0						5				2				0						3				2				2						9				4
30	0			0				0						2				2				0						0				1				3						1				5
m - dead daphnium
Replicate/days 0.425 µg/L	0	1	d	2	d	3	d	4	d	5	d	6	d	7	d	8	d	9	d	10	d	11	d	12	d	13	d	14	d	15	d	16	d	17	d	18	d	19	d	20	d	21	d	22	d	23	d	24	d
1	0			0				0						6				2				1						5				2				5						3				2
2	0			0				0						1				1				0						3				1				1						6				2
3	0			0				0						4				0				1						1				4				4						2				3
4	0			0				0						2				1				1						6				4				1						2				1
5	0			0				0						3				0				0						2				5				3						0	m
6	0			0				0						2				1				0						4				3				1						4				0
7	0			0				0						2				0				4						0	m
8	0			0				0						3				0				3						2				0	m
9	0			0				0						3				0				1						0				0	m
10	0			0				0						7				0				2						2				3				2						4				3
Replicate/days 4.25 µg/L	0	1	d	2	d	3	d	4	d	5	d	6	d	7	d	8	d	9	d	10	d	11	d	12	d	13	d	14	d	15	d	16	d	17	d	18	d	19	d	20	d	21	d	22	d	23	d	24	d
1	0			0				0						4				0				3						3				3				2						0	m
2	0			0				0						3				0	m
3	0			0				0						2				0				1						5				1				1						4	m
4	0			0				0						4				0				3						2				7				0						0	m
5	0			0				0						3	m
6	0			0				0						2				1				0						3				5				0						1				7
7	0			0				0						0	m
8	0			0				0						4				0				0						2				1				4						4				2
9	0			0				0						3				4				0						3				6				2						2				1
10	0			0				0						2				2				1						7				1				3						4				3
Replicate/days 42.5 µg/L	0	1	d	2	d	3	d	4	d	5	d	6	d	7	d	8	d	9	d	10	d	11	d	12	d	13	d	14	d	15	d	16	d	17	d	18	d	19	d	20	d	21	d	22	d	23	d	24	d
1	0			0				0						1				4				1						4				1				2						2				1
2	0			0				0						2				4				1						3				2				2						3				1
3	0			0				0						2				3				2						2	m
4	0			0				0						2				0				2						2				0				0						0	m
5	0			0				0						0				0				0						3				0				0						0	m
6	0			0				0						4				2				2						4				0				0						0	m
7	0			0				0						2				4				2						2				0				0	m
8	0			0				0						1				3				1						4				1	m
9	0			0				0						3				1				1						2				1	m
10	0			0				0						2				0				0						1				0				0	m
[truncated: 39 more columns]

## Sheet: Eu_F1
Europium
F1 generation
2021-10-29	(0 day)
Replicate/days Control	0	1	d	2	d	3	d	4	d	5	d	6	d	7	d	8	d	9	d	10	d	11	d	12	d	13	d	14	d	15	d	16	d	17	d	18	d	19	d	20	d	21	d	22	d	23	d	24	d
1	0					0				0				1						2				1				0						11				0				3						4
2	0					0				0				0						1				0				0						5				0				0						6
3	0					0				0				0						0	m
4	0					0				0				0						1				0				0						0				2				1						8
5	0					0				1				0						4				0				0						2				1				3						4
6	0					0				0				0						2				1				0						4				0				0						9
7	0					0				0				0						0				1				2						8				0				3						4
8	0					0				0				0						2				0				2						6				2				1						8
9	0					0				1				0						0				0				0						5				0				2						7
10	0					0				1				0						0				0				1						2				0				2						2
11	0					0				0				0						2				0				0						9				0	m
12	0					0				0				0						2				0				0						3				0				0						3
13	0					0				0				0						0				0				0						3				3				0						8
14	0					0				1				0						3				0				0						0				0				0						4
15	0					0				0				0						0				1				1						2				2				1						8
16	0					0				0				0						2				0				0						4				3				4						4	m
17	0					0				0				0						1				0				2						1				4				1						5
18	0					0				0				0						1				0				0						5				2				1						5
19	0					0				0				0	m
20	0					0				0				0						2				0				0						3				3				2						3
21	0					0				0				0						2				0				1						2				2				0						9
22	0					0				0				0						1				2				0						5				4				2						5
23	0					0				3				1						2				0				2						3				0	m
24	0					0				0				0						1				0				0						2				0				3						2
25	0					0				2				0						1				0				1						2				0				3						7
26	0					0				1				0						0				2				0						7				4				2						3
27	0					0				0				0						2				0				0						5				2				2						4
28	0					0				0				0						2				0				0						4				2				3						4
29	0					0				0				0						2				1				0						2				3				3						5
30	0					0				0				0						1				1				0						5				3				2						6
m - dead daphnium
Replicate/days 0.41 µg/L	0	1	d	2	d	3	d	4	d	5	d	6	d	7	d	8	d	9	d	10	d	11	d	12	d	13	d	14	d	15	d	16	d	17	d	18	d	19	d	20	d	21	d	22	d	23	d	24	d
1	0					0				0				0						2				2				0						3				2				1						8
2	0					0				0				0						3				2				2						2				0	m
3	0					0				0				0						2				0				2						3				3				2						0
4	0					0				0				0						2				2				2						3				2				3						7
5	0					0				2				0						0				3				0						6				0				0						2	m
6	0					0				1				0						1				1				3						1				1				0						4
7	0					0				1				0						2				0				2						2				0				0						7
8	0					0				0				0						2				4				0						3				2				2						6
9	0					0				0				0						1				4				3						2				1				3						3
10	0					0				0				0						3				0				2						3				0	m
Replicate/days 4.1 µg/L	0	1	d	2	d	3	d	4	d	5	d	6	d	7	d	8	d	9	d	10	d	11	d	12	d	13	d	14	d	15	d	16	d	17	d	18	d	19	d	20	d	21	d	22	d	23	d	24	d
1	0					0				0				0						2				1				4						5				0				0						6
2	0					0				0				0						0	m
3	0					0				1				0						1				0				1						4				0				1						6
4	0					0				0				0						2				0				3						3				0				0						4
5	0					0				2				0						0				0				2						2				2				0						6
6	0					0				0				0						1				1				3						3	m
7	0					0				1				0						2				1				2						3				2				2						3
8	0					0				2				0						0				1				2						1	m
9	0					0				0				0						2				1				3						3				0				0						7
10	0					0				0				0						6				0				0						4				3				0						5
Replicate/days 41 µg/L	0	1	d	2	d	3	d	4	d	5	d	6	d	7	d	8	d	9	d	10	d	11	d	12	d	13	d	14	d	15	d	16	d	17	d	18	d	19	d	20	d	21	d	22	d	23	d	24	d
1	0					0				1				0						2				2				2						4				1				1						0
2	0					0				0				0						0	m
3	0					0				1				0						2				1				2						1				2				0						2
4	0					0				0				0						1				1				3						1				0				0						0
5	0					0				2				0						3				1				2						3				0				1						4
6	0					0				1				0						2				3				0						3				0				2						0
7	0					0				0				0						2				1				2						2				0				2						0
8	0					0				0				0						3				1				2						2				0				1						4
9	0					0				0				0						2				2				3						1				0				0						2
10	0					0				0				0						0	m
Replicate/days 410 µg/Lµg/L	0	1	d	2	d	3	d	4	d	5	d	6	d	7	d	8	d	9	d	10	d	11	d	12	d	13	d	14	d	15	d	16	d	17	d	18	d	19	d	20	d	21	d	22	d	23	d	24	d
1	0			0				0	m
2	0			0				0	m
3	0			0				0	m
4	0			0				0	m
5	0			0	m
6	0			0				0	m
7	0			0				0	m
8	0			0	m
9	0			0				0	m
10	0			0				0	m
[truncated: 39 more columns]

[truncated: 2 more sheets: Eu_F2, Eu_F3]
